# Supplementary material for: Intertwining DNA-RNA nanocapsules loaded with tumor neoantigens as synergistic nanovaccines for cancer immunotherapy
Source: PubMed Central journal article supplement (PMC5684198; doi:10.1038/s41467-017-01386-7), 2017-11-14
Supplement: 41467_2017_1386_MOESM1_ESM.pdf [file 41467_2017_1386_MOESM1_ESM.pdf]

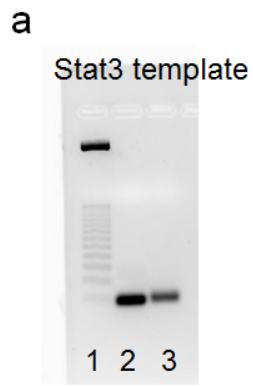

1. 25bp Ladder
2. Unligated
3. Ligated

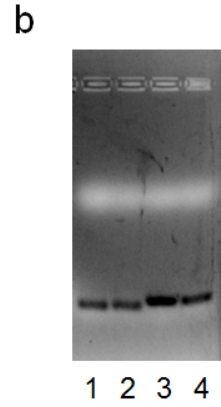

1. Control circular DNA
2. Control circular DNA + Exo I and Exo III
3. Circular stat3 template
4. Circular stat3 template + Exo I and Exo III

**Supplementary Figure 1. Images of agarose gel electrophoresis verifying the circularization of template for Stat3 shRNA.**

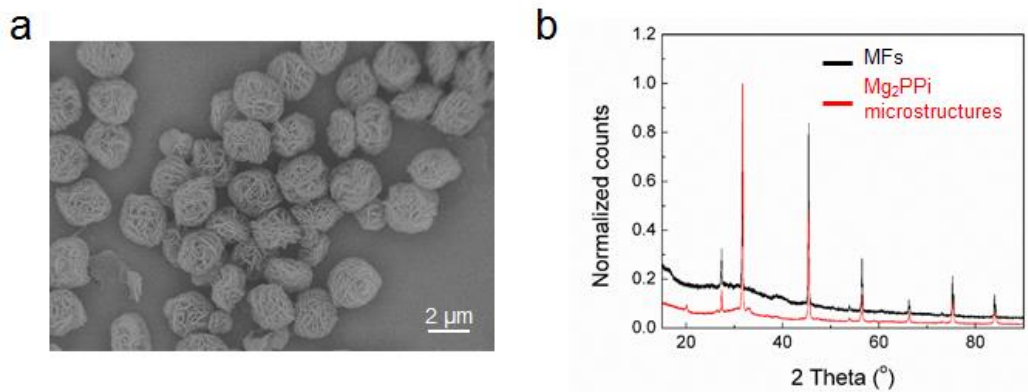

**Supplementary Figure 2. Characterization of DNA-RNA MFs.** (a) An SEM image showing pure Mg<sub>2</sub>PPi nanostructures formed by mixing Mg<sup>2+</sup> (16 mM) with PPi<sup>4-</sup> (5 mM). (b) XRD graphs of DNA-RNA microflowers (MFs) generated from mixed RCT/RCR, and Mg<sub>2</sub>PPi microstructures.

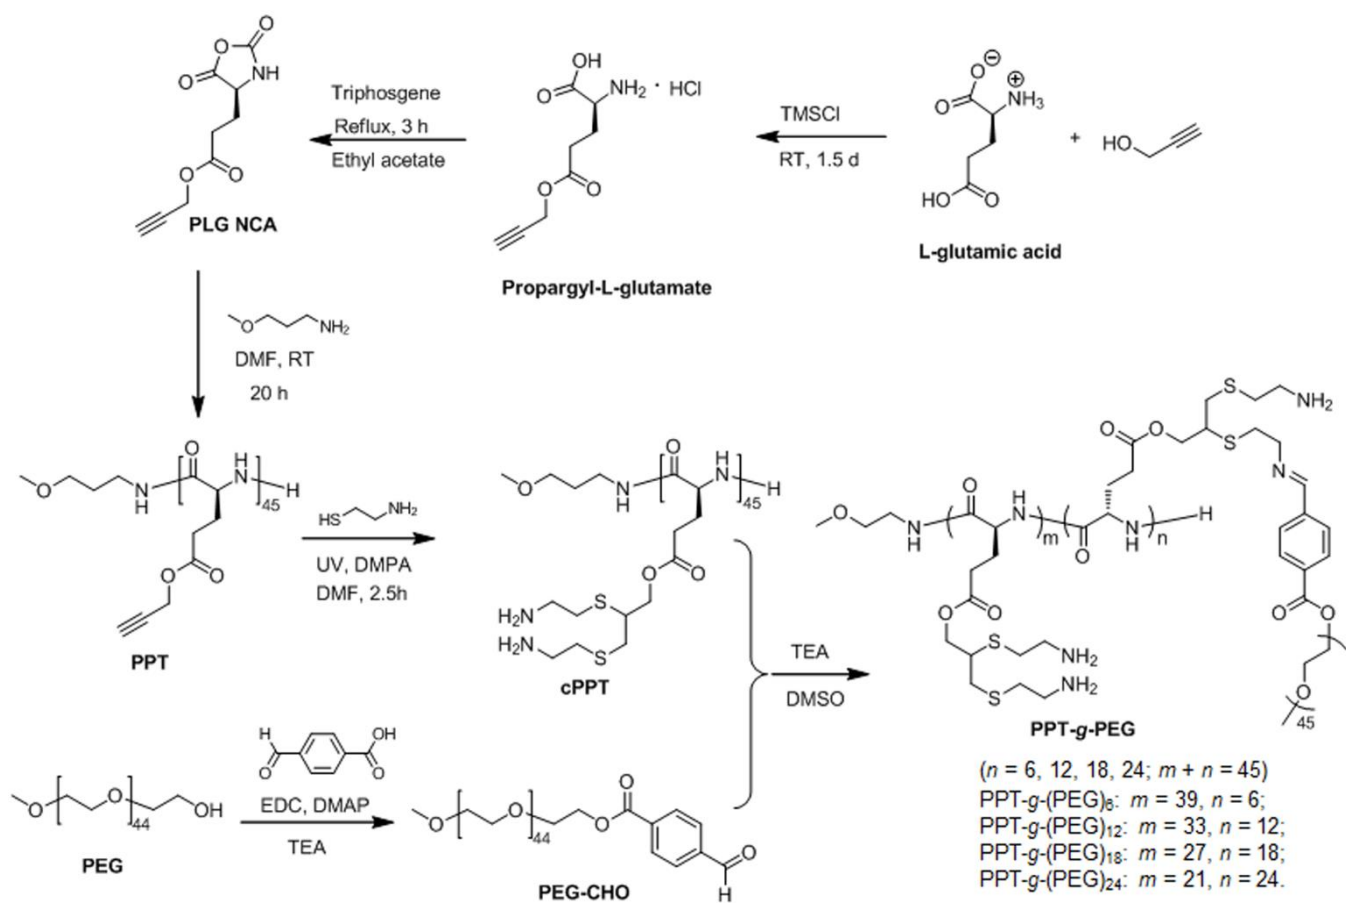

**Supplementary Figure 3.** Synthesis scheme of multifunctional and biocompatible PPT-g-PEG derivatives with acid-responsively cleavable PEG.

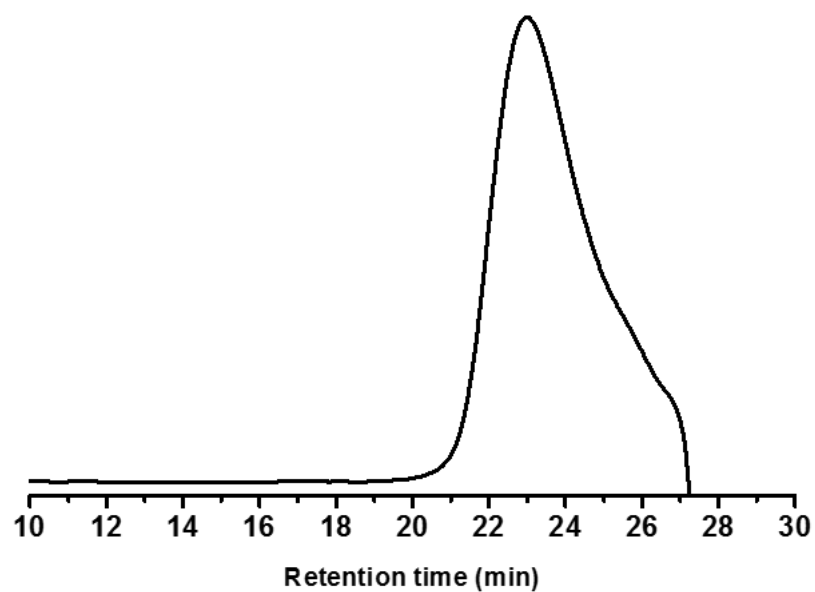

**Supplementary Figure 4. Gel permeation chromatography trace of PPT.**  $M_n$  15145 Da,  $M_w$  18691Da, PDI: 1.23, using poly(methyl methacrylate)s as calibration standards.

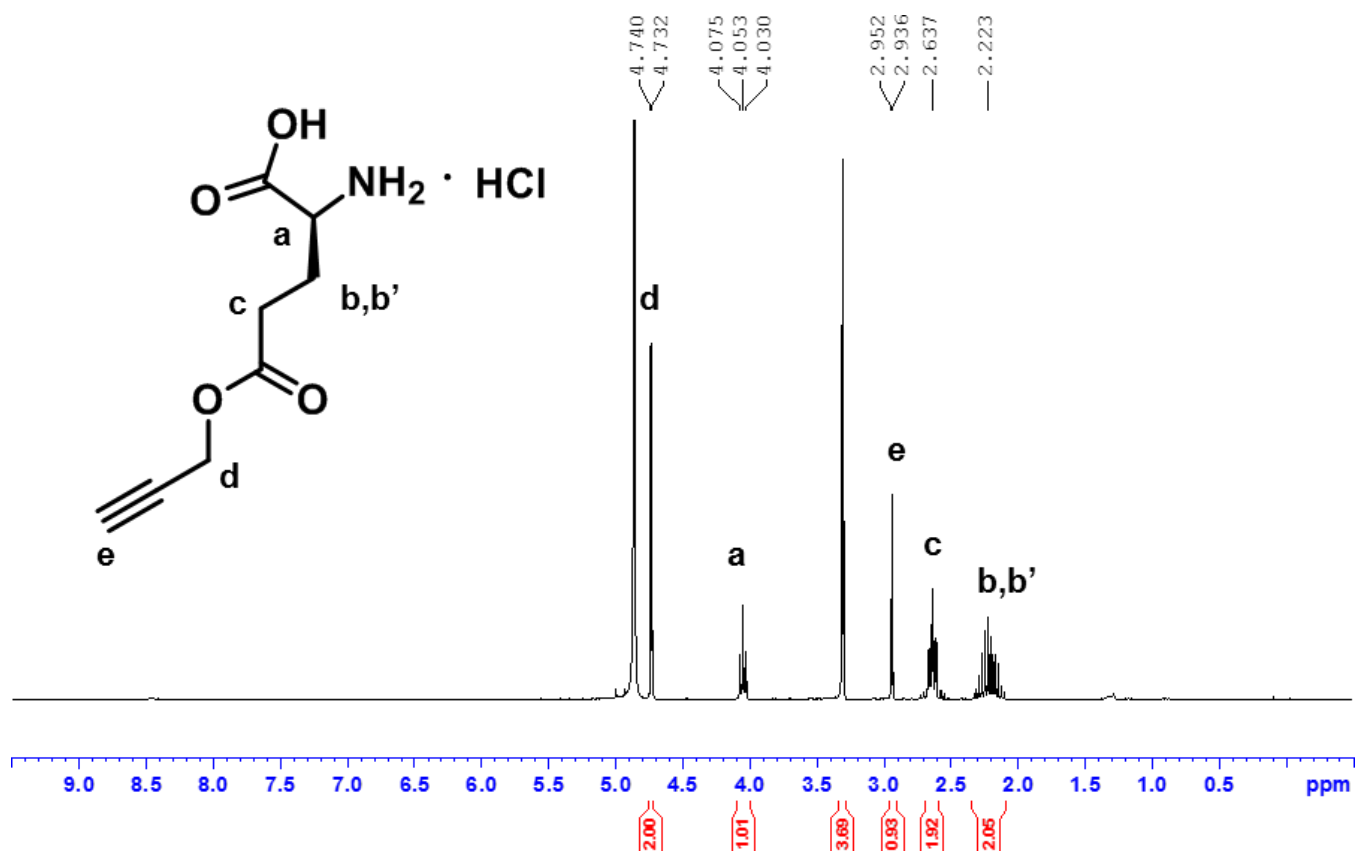

Supplementary Figure 5. <sup>1</sup>H NMR of Propargyl-L-glutamate in MeOD.

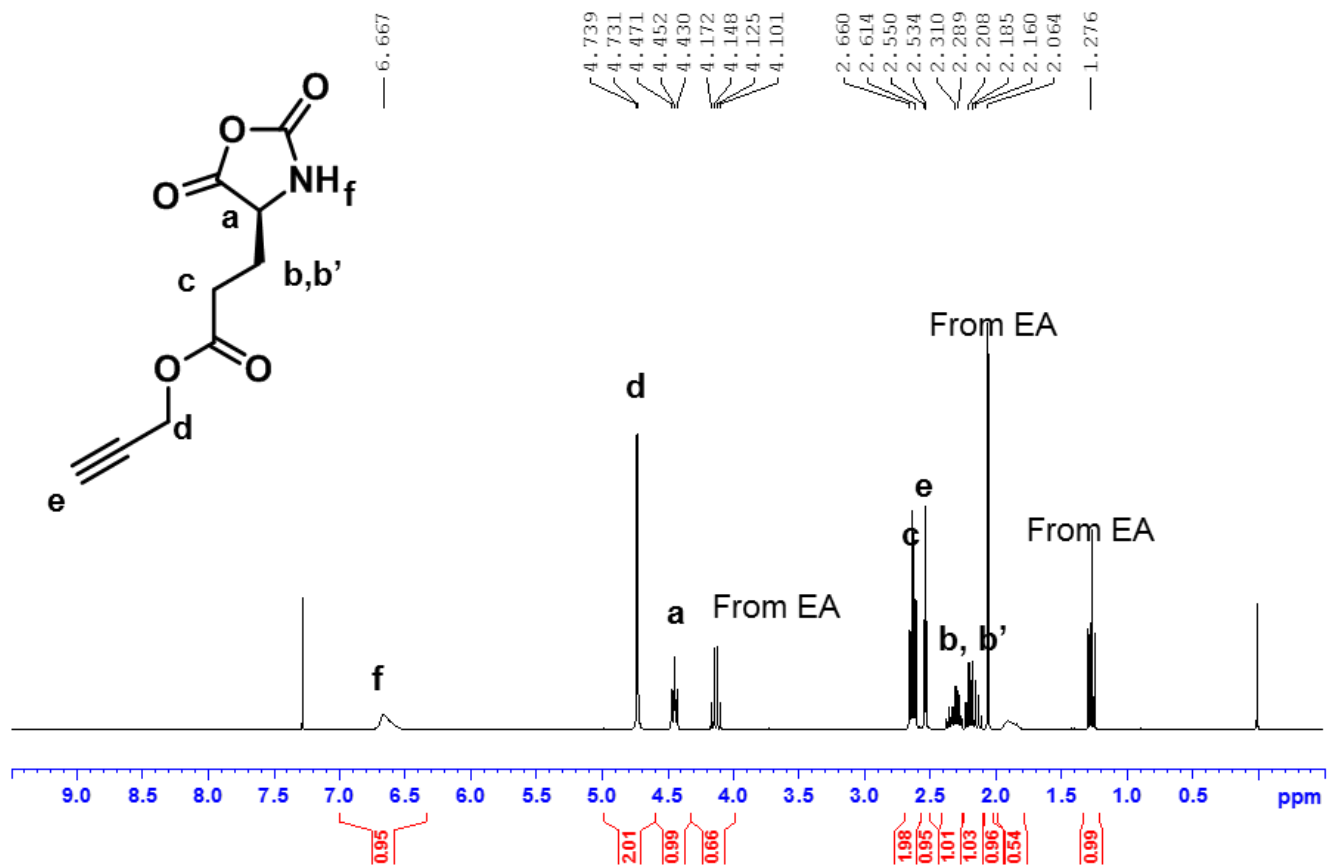

Supplementary Figure 6. <sup>1</sup>H NMR of PLG NCA in CDCl<sub>3</sub>.

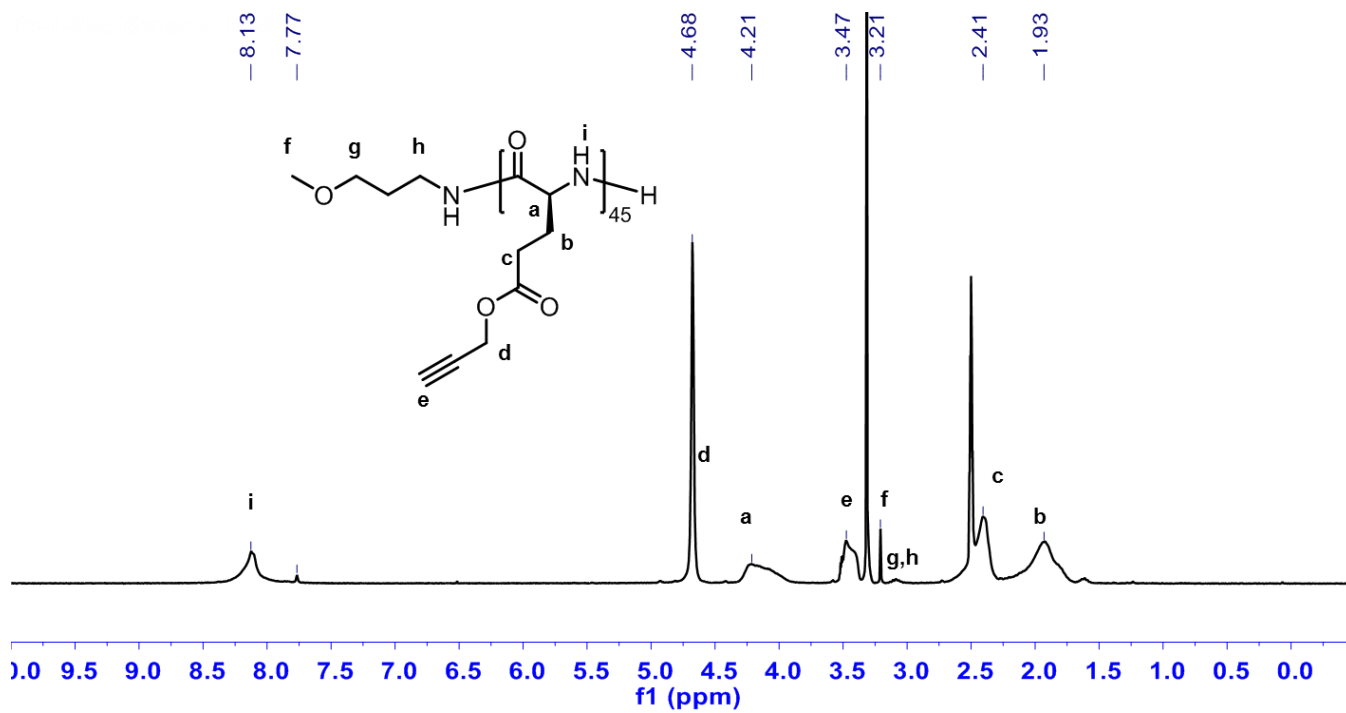

Supplementary Figure 7. <sup>1</sup>H NMR of PPT<sub>45</sub> in DMSO-d<sub>6</sub>.

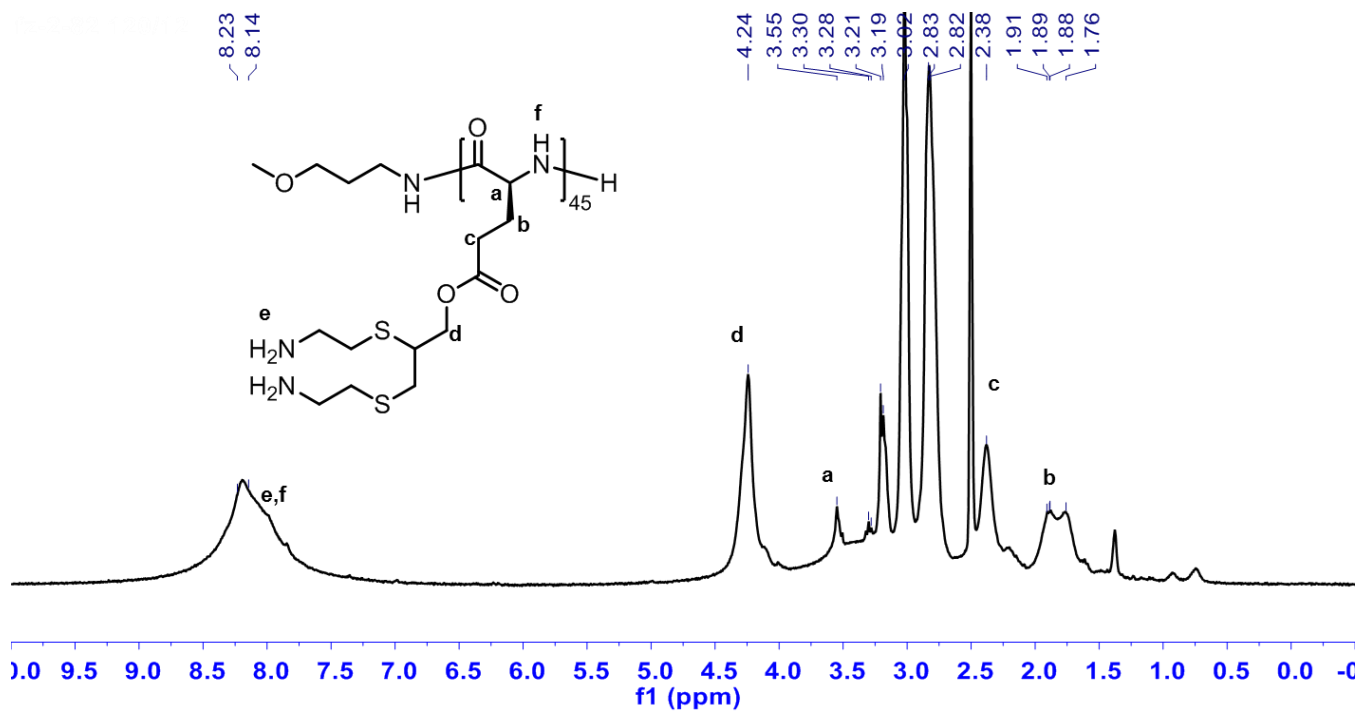

Supplementary Figure 8. <sup>1</sup>H NMR of cPPT<sub>45</sub> in DMSO-d<sub>6</sub>.



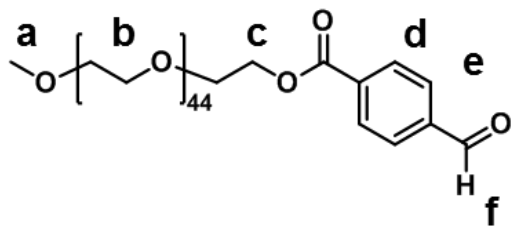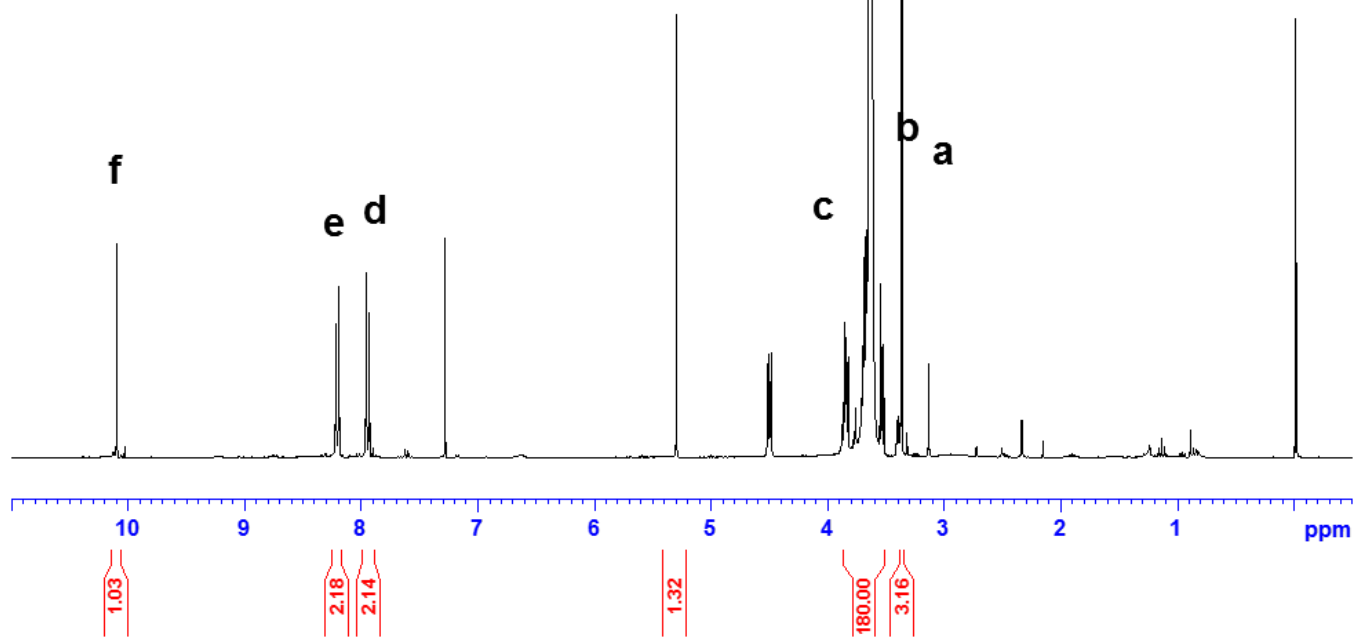

Supplementary Figure 9. <sup>1</sup>H NMR of PEG-CHO in CDCl<sub>3</sub>.

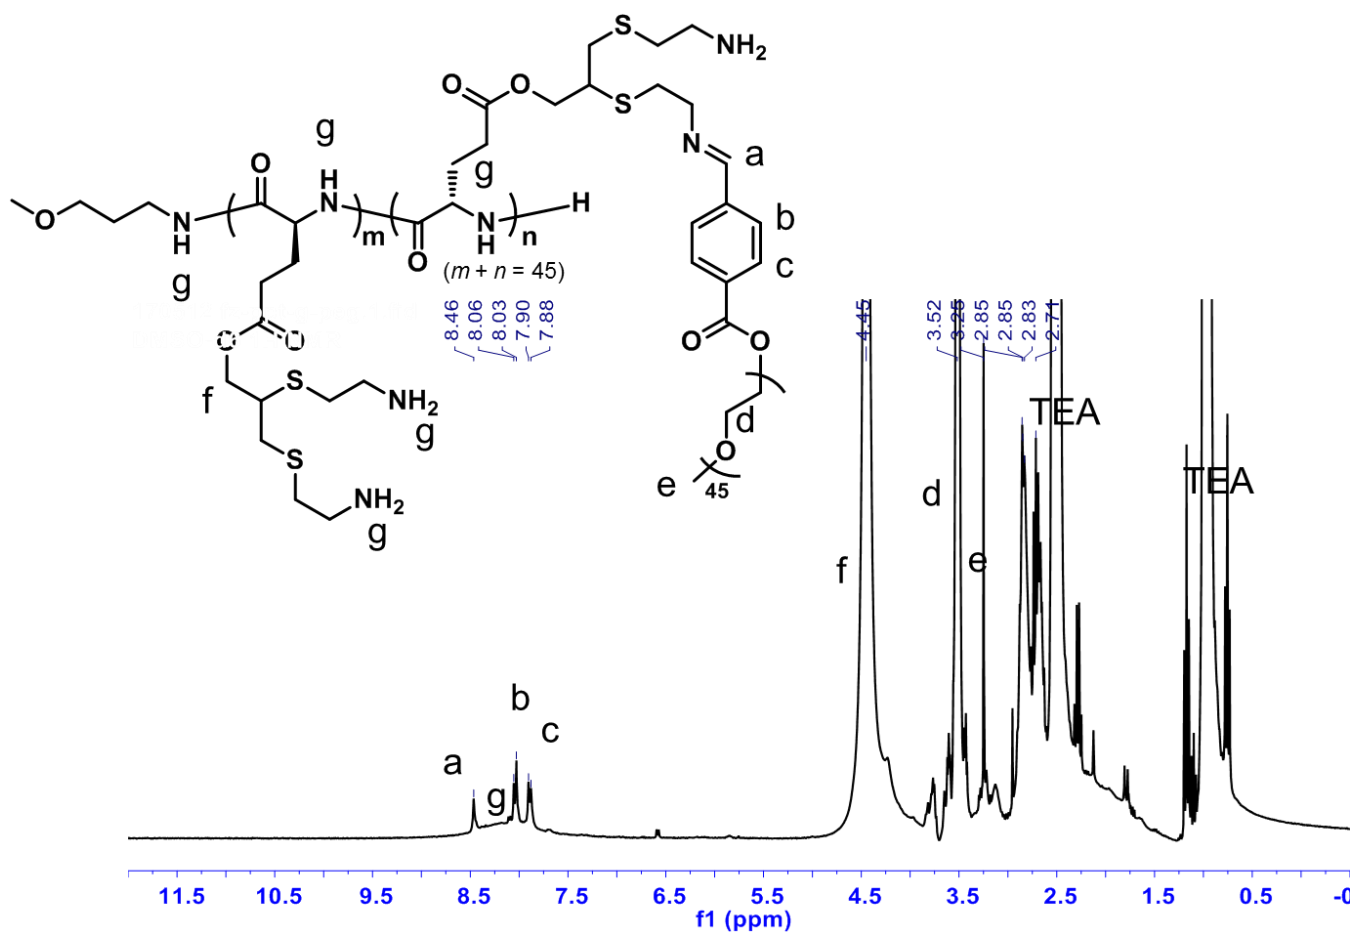

**Supplementary Figure 10.**  $^1\text{H}$  NMR of PPT-g-PEG in  $\text{DMSO-d}_6$ . The aldehyde proton at  $\delta$  10.12 disappeared completely, but a new peak appeared at  $\delta$  8.46, indicating the complete conversion of CHO to Schiff base.

Cleavable PPT-*g*-(PEG)<sub>12</sub>    Cleavable PPT-*g*-(PEG)<sub>18</sub>

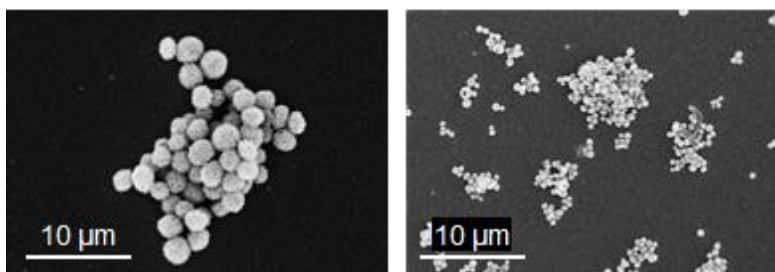

**Supplementary Figure 11.** SEM images showing the morphology of residual DNA-RNA microflowers after incubation with PPT-*g*-(PEG)<sub>12</sub> and PPT-*g*-(PEG)<sub>18</sub> polymers for 48 h. This indicates the incomplete shrinkage under these conditions.

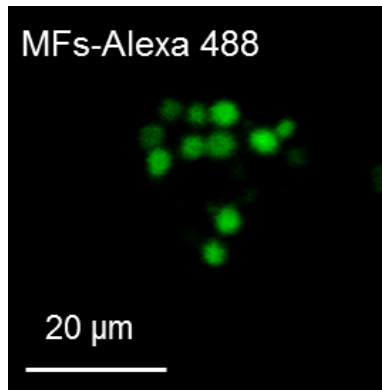

**Supplementary Figure 12.** Fluorescence image of DNA-RNA microflowers (MFs) labeled with Alexa 488 through Alexa 488-labeled DNA primer.

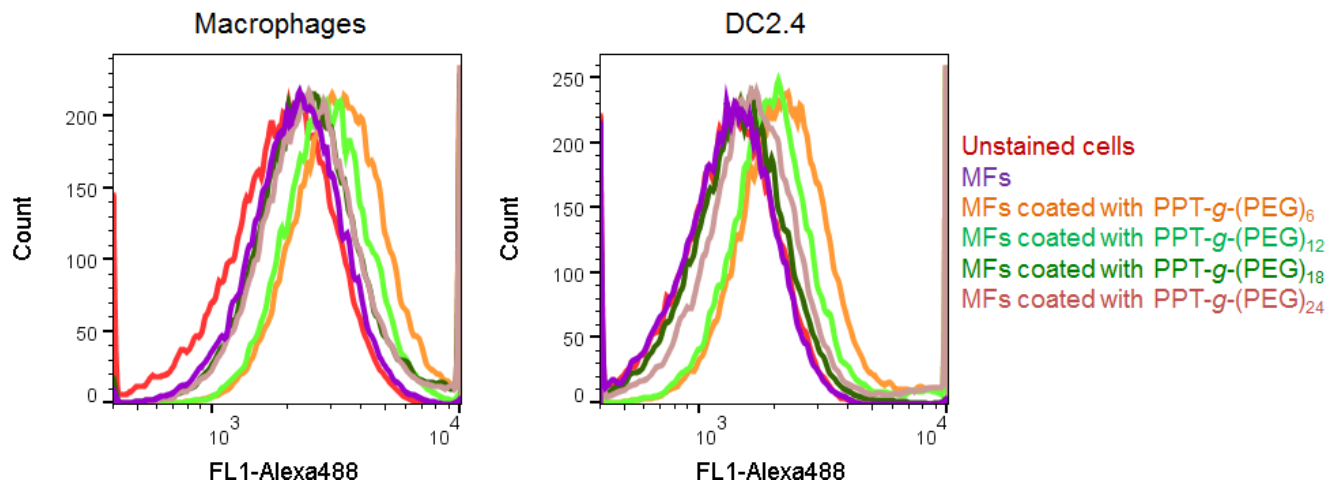

**Supplementary Figure 13.** Flow cytometry results showing the ability of RAW264.7 cells and DC2.4 cells to internalize microflowers (MFs) treated with a series of PPT-*g*-PEG copolymers for shrinkage. Alexa 488 was labeled on the original MFs via DNA primers used for DNA RCR.

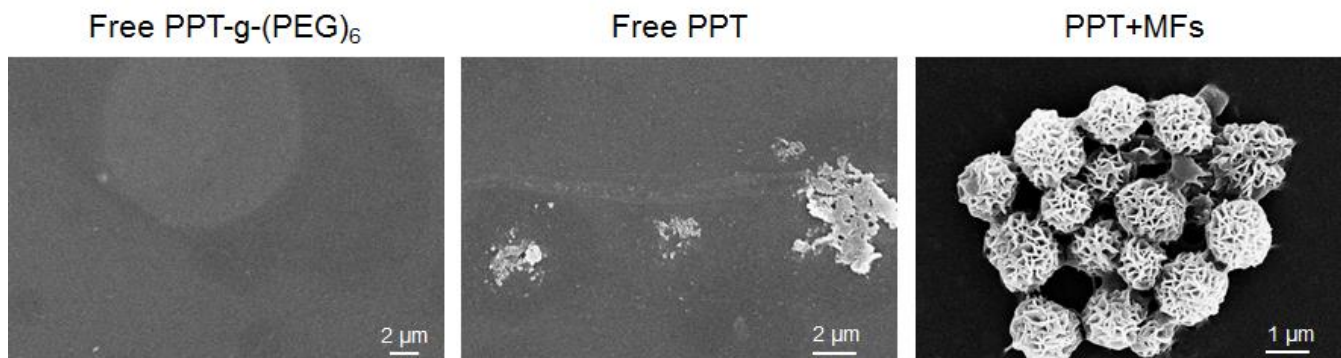

**Supplementary Figure 14.** SEM images showing the morphology of free PPT-*g*-(PEG)<sub>6</sub> polymers, free PPT, and DNA-RNA microflowers mixed in PPT solutions.

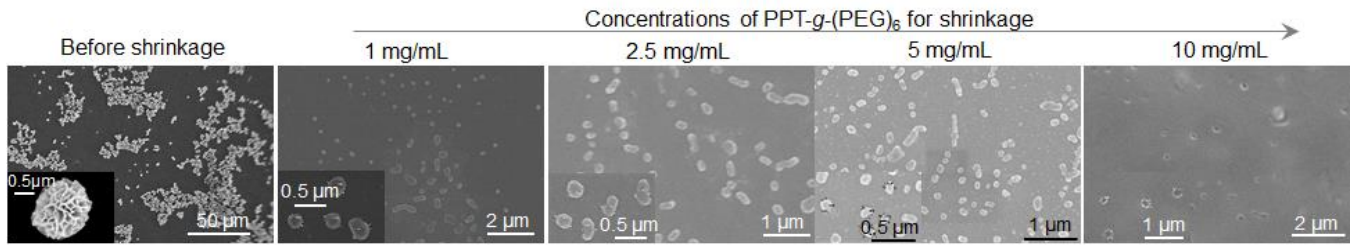

**Supplementary Figure 15.** SEM images showing the products before and after incubation of DNA-RNA microflowers with increasing concentrations of PPT-g-(PEG)<sub>6</sub> for 48 h.

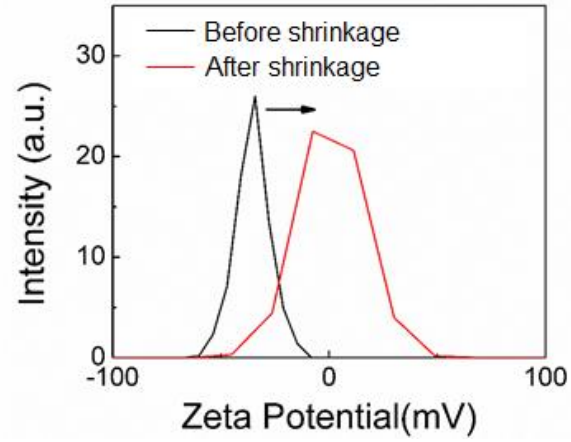

**Supplementary Figure 16.** Zeta potential of DNA-RNA microflowers before (-35.3 mV) and after (1.5 mV) shrinking using PPT-*g*-(PEG)<sub>6</sub> for 48 h.



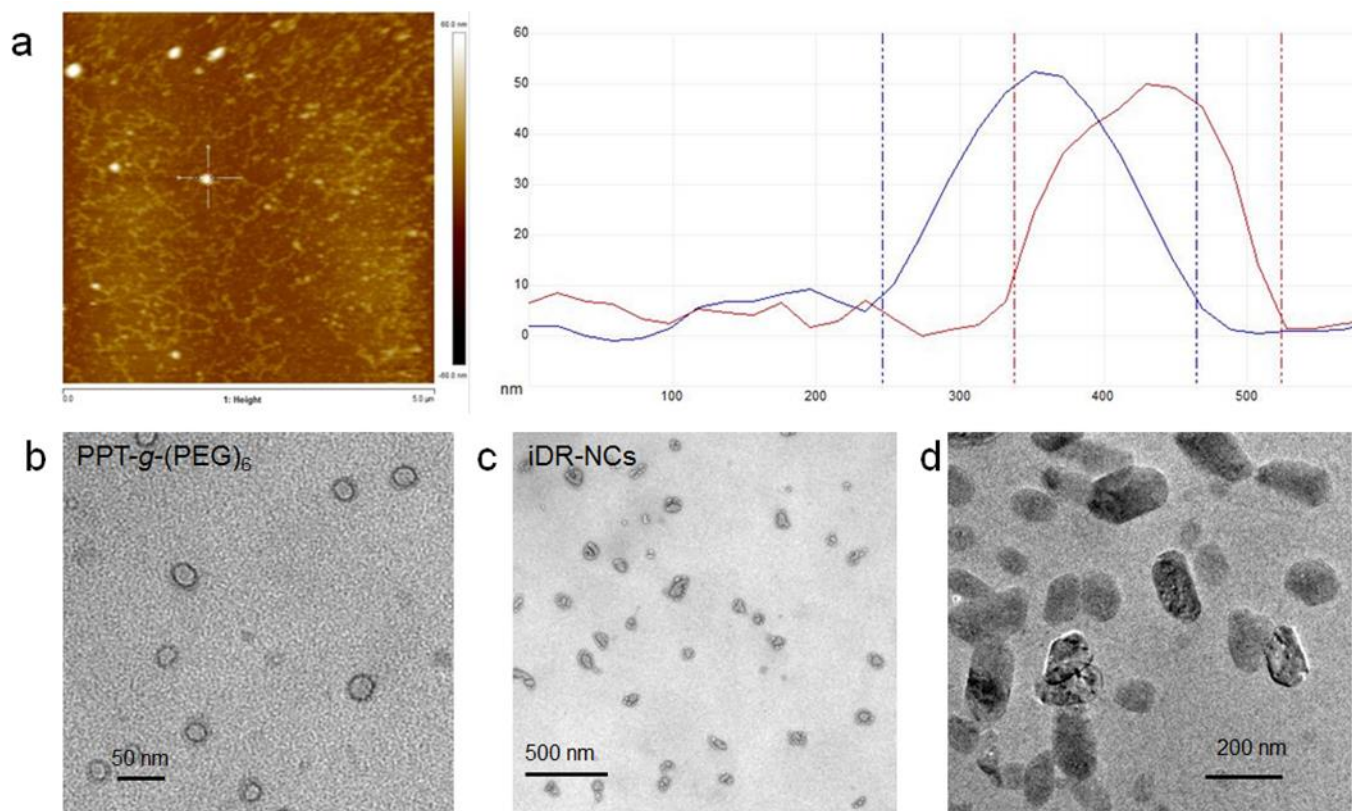

**Supplementary Figure 17.** (a) AFM images (left) and the corresponding dimension measurement results (right) of iDR-NCs. The red lines in AFM images marked the location of dimension measurement. (b) A TEM image showing the morphologies of small nanoparticles formed by PPT-*g*-(PEG)<sub>6</sub> polymers (c) TEM images showing the morphologies of iDR-NCs shrunk by PPT-*g*-(PEG)<sub>6</sub>. (d) A HR-TEM image showing the morphologies of iDR-NCs shrunk by PPT-*g*-(PEG)<sub>6</sub>.

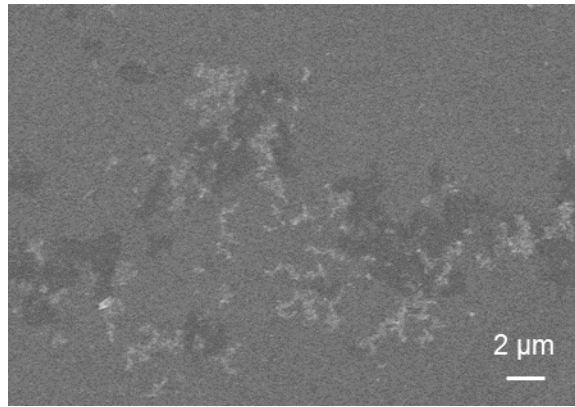

**Supplementary Figure 18.** An SEM image showing that DNA-RNA MFs were dissolved by treating with EDTA (5 mM) for 30 min.

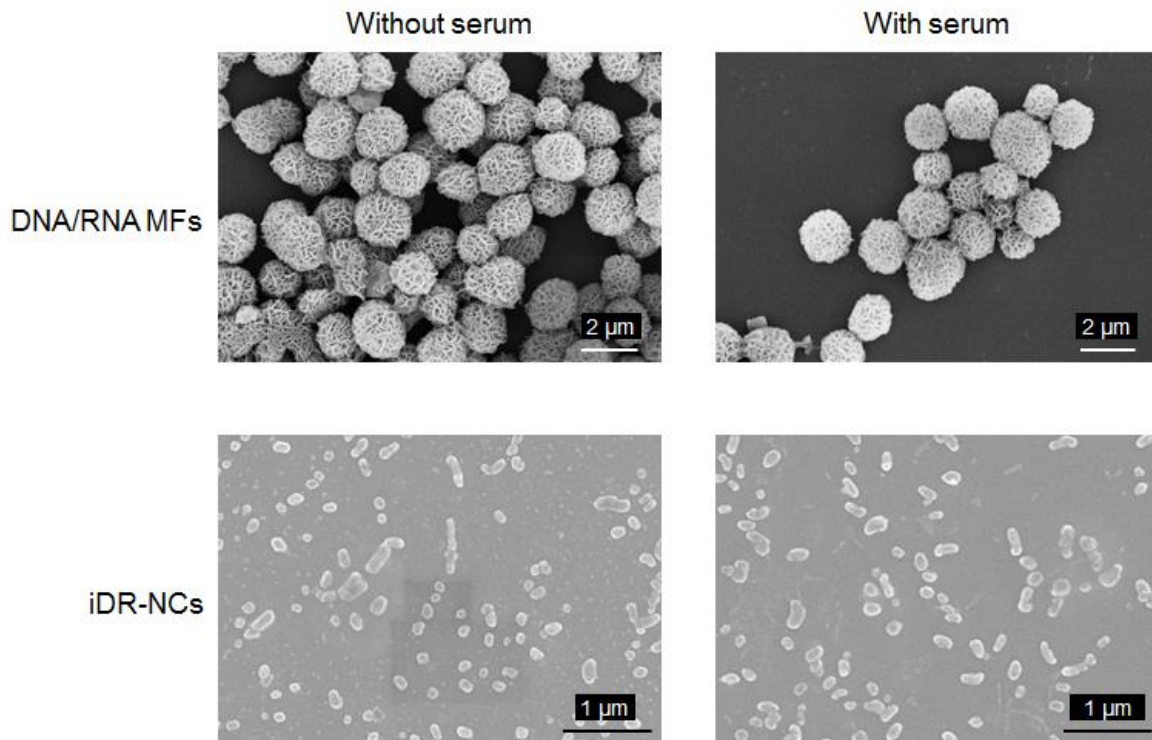

**Supplementary Figure 19.** SEM images showing the comparison of the morphologies of DNA-RNA MFs (upper panel) and iDR-NCs (lower panel) with or without incubation in serum. The undetectable changes upon incubation in serum demonstrates the high biostability of iDR-NCs.

a

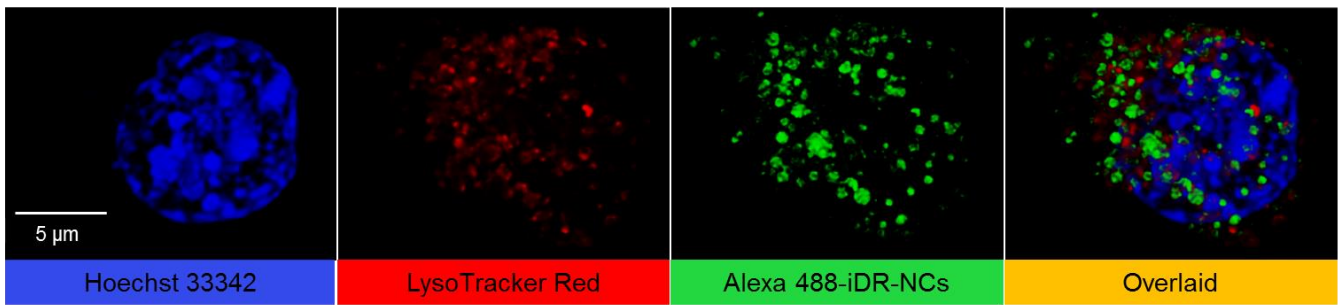

b

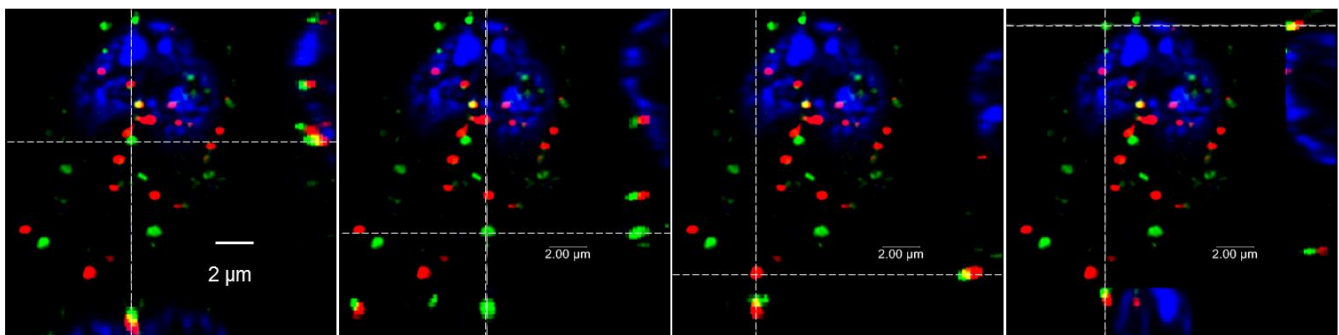

Hoechst 33342; LysoTracker Red; Alexa 488-iDR-NCs

**Supplementary Figure 20. Super-resolution confocal microscopy images displaying that Alexa 488-labeled iDR-NCs were efficiently delivered into DC2.4 cells and resided in the endolysosome after incubation for 3 h. (a) One DC2.4 cell showing individual or overlaid signals. (b) A panel of cross-section images showing the fluorescence signals at 3 different dimensions. The 1<sup>st</sup>, 3<sup>rd</sup>, and 4<sup>th</sup> images showed the presence of iDR-NCs in endolysosome, and the 2<sup>nd</sup> image showed the presence of iDR-NCs in cytosol. The endolysosome was stained by LysoTracker Red DND-99, and nucleus was stained by Hoechst 33342.**

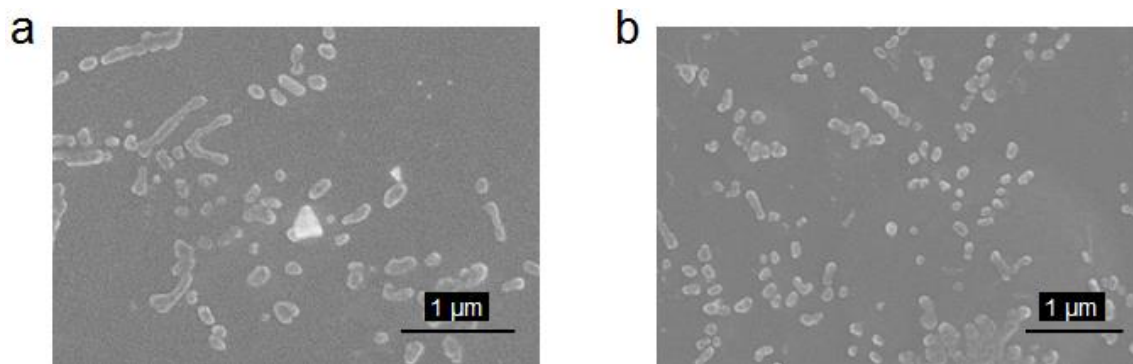

**Supplementary Figure 21.** TEM images of iDR-NC/CSIINFEKL complexes (a) and iDR-NC/Adpgk complexes (b).

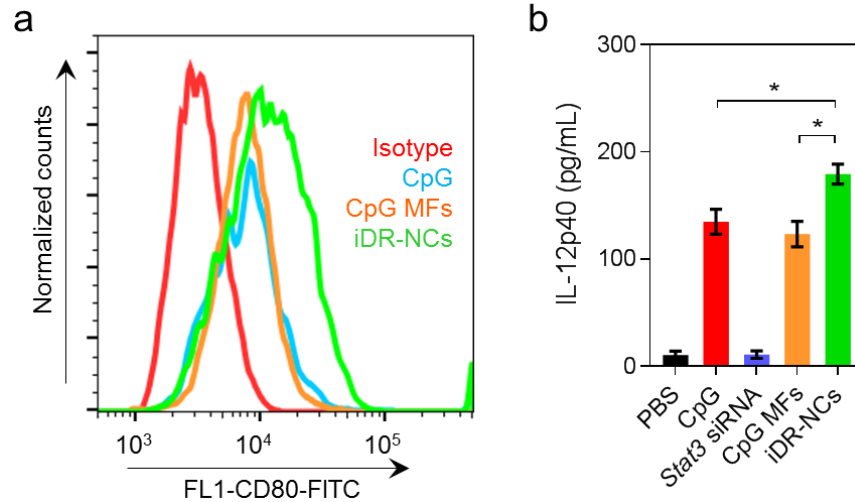

**Supplementary Figure 22. Immunostimulation of iDR-NCs in RAW264.7 macrophages.** (a) Flow cytometry results showing that iDR-NC (100 nM equivalent CpG for 24 h) elevated the expression of costimulatory factors CD80 in RAW264.7 macrophages. (b) ELISA results suggest iDR-NCs induced RAW264.7 macrophages to secrete significantly more proinflammatory cytokines IL-12p40 than CpG or CpG microflowers (MFs), after treating cells at the concentrations of 100 nM equivalent CpG for 24 h. As a control, *stat3* siRNA were not immunostimulatory.

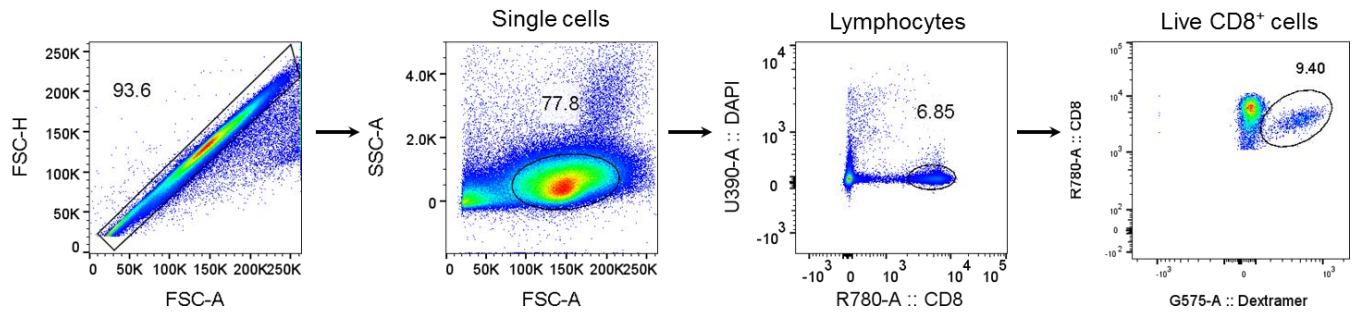

**Supplementary Figure 23.** Gating tree used for flow cytometric analysis of antigen-specific CD8<sup>+</sup> T cells in dextramer staining studies.

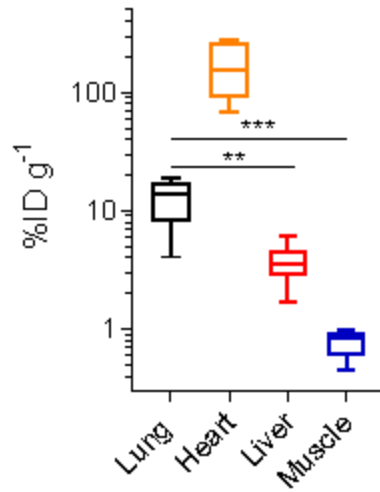

**Supplementary Figure 24.** Percent of injected dose of FDG per gram of tissue (%ID/g) in organs of interest on day 40 post immunotherapy of MC38 tumor.



**Supplementary Table 1.** DNA sequences. CpG (CpG 1826) had phosphorothioate backbone unless denoted otherwise, and all other DNA had phosphodiester backbone. Purple sequences: CpG or CpG analogs; Red sequences: GpC or GpC analogs; Underlined sequence: complementary sequences between primers and the corresponding templates; Shaded sequence: CpG or GpC dinucleotide.

|                                     | <b>Sequences (5'-3')</b>                                                                              |
|-------------------------------------|-------------------------------------------------------------------------------------------------------|
| <b>CpG</b>                          | TCCATGACGTTCTGACGTT                                                                                   |
| <b>GpC</b>                          | TCCATGAGCTTCCTGAGCTT                                                                                  |
| <b>Primer for NCs</b>               | <u>ACGTTCTGACGTTTTTCAGCGTGACTTTTCCATGACGTTCC</u>                                                      |
| <b>Template for NCs</b>             | 5'-phosphate-<br>CGCTGAAAACGTCAGGAACGTCATGGAAAAAACGTCAGGA<br>ACGTCATGGAAAAAACGTCAGGAACGTCATGGAAAAGTCA |
| <b>Primer for GpC-NFs</b>           | <u>AGCTTCCTGAGCTTTTTTCAGCGTGACTTTTCCATGAGCTTCC</u>                                                    |
| <b>Template for GpC-NFs</b>         | 5'-phosphate-<br>CGCTGAAAAGCTCAGGAAGCTCATGGAAAAAAGCTCAGGA<br>AGCTCATGGAAAAAAGCTCAGGAAGCTCATGGAAAAGTCA |
| <b>Stat3 siRNA sense strand</b>     | CAGGGUGUCAGAUCACAUGGGCUAA                                                                             |
| <b>Stat3 siRNA antisense strand</b> | UUAGCCCAUGUGAUCUGACACCCUGAA                                                                           |
| <b>Stat3 linear template</b>        | 5'-phosphate-<br>TGACACCCTGTGACAGGAAGTTCAGGGTGTGATCACATGG<br>GCTAATTGTTTAGCCCATGTGATC                 |

**Supplementary Table 2. Comparison of RCR and RCT.**

|                           | <b>RCR</b>                                                                                                                | <b>RCT</b>                                                                         |
|---------------------------|---------------------------------------------------------------------------------------------------------------------------|------------------------------------------------------------------------------------|
| <b>Product</b>            | DNA                                                                                                                       | RNA                                                                                |
| <b>Temperature (°C)</b>   | 30                                                                                                                        | 37                                                                                 |
| <b>Enzyme</b>             | Phi29 DNA polymerase                                                                                                      | T7 RNA polymerase                                                                  |
| <b>Buffer composition</b> | 50 mM Tris-HCl<br>10 mM MgCl <sub>2</sub><br>10 mM (NH <sub>4</sub> ) <sub>2</sub> SO <sub>4</sub><br>4 mM dithiothreitol | 40 mM Tris-HCl<br>6 mM MgCl <sub>2</sub><br>2 mM spermidine<br>1 mM dithiothreitol |
| <b>Primer/promotor?</b>   | Often rely on a separate primer DNA                                                                                       | Not always rely on a separate primer/promotor DNA                                  |
