# Supplementary material for: Intertwining DNA-RNA nanocapsules loaded with tumor neoantigens as synergistic nanovaccines for cancer immunotherapy
Source: PubMed Central journal article supplement (PMC5684198; doi:10.1038/s41467-017-01386-7), 2017-11-14
Supplement: 41467_2017_1386_MOESM2_ESM.pdf [file 41467_2017_1386_MOESM2_ESM.pdf]

## **Description of Additional Supplementary Files**

File Name: Supplementary Movie 1

Description: 3D reconstructed super-resolution confocal microscopy of one DC that efficiently internalized Alexa488-labeled iDR-NCs.
